# Supplementary material for: Bile acids contribute to the development of non-alcoholic steatohepatitis in mice
Source: PubMed Central journal article supplement — JHEP Rep. 2021 Oct 13;4(1):100387. doi: 10.1016/j.jhepr.2021.100387 (PMC8604813; doi:10.1016/j.jhepr.2021.100387), 2021-10-13
Supplement: mmc2.pdf [file mmc2.pdf]

## Journal of Hepatology

### CTAT methods

Tables for a “Complete, Transparent, Accurate and Timely account” (CTAT) are now mandatory for all revised submissions. The aim is to enhance the reproducibility of methods.

- Only include the parts relevant to your study
- Refer to the CTAT in the main text as ‘Supplementary CTAT Table’
- Do not add subheadings
- Add as many rows as needed to include all information
- Only include one item per row

**If the CTAT form is not relevant to your study, please outline the reasons why:**

|   |
|---|
| / |
|---|

#### 1.1 Antibodies

| Name                            | Citation                                                                                            | Supplier      | Cat no.   | Clone no.     |
|---------------------------------|-----------------------------------------------------------------------------------------------------|---------------|-----------|---------------|
| Polyclonal rat anti-mouse F4/80 | <a href="https://doi.org/10.1038/s41374-019-0315-9">https://doi.org/10.1038/s41374-019-0315-9</a>   | AbD Serotec   | MCA497G   | A3-1          |
| Polyclonal rat anti-mouse Ly6G  | <a href="https://doi.org/10.1038/s41374-019-0315-9">https://doi.org/10.1038/s41374-019-0315-9</a>   | BD Pharmingen | 551459    | 1A8           |
| Monoclonal rat anti-mouse CK19  | <a href="https://doi.org/10.1016/j.jhep.2019.02.003">https://doi.org/10.1016/j.jhep.2019.02.003</a> | DSHB          | Troma III | Not available |
| Polyclonal rabbit anti-rat      | <a href="https://doi.org/10.1038/s41374-019-0315-9">https://doi.org/10.1038/s41374-019-0315-9</a>   | Vector        | AI-4001   | Not available |
| Envision anti-rabbit-HRP        | <a href="https://doi.org/10.1038/s41374-019-0315-9">https://doi.org/10.1038/s41374-019-0315-9</a>   | Dako          | K4003     | Not available |

#### 1.2 Cell lines

| Name     | Citation                                                                                    | Supplier | Cat no.  | Passage no. | Authentication test method |
|----------|---------------------------------------------------------------------------------------------|----------|----------|-------------|----------------------------|
| RAW264.7 | <a href="https://www.atcc.org/products/tib-71">https://www.atcc.org/products/tib-71</a>     | ATCC     | TIB-71   | 4-5         | Morphology check           |
| L929     | <a href="https://www.atcc.org/products/ccl-1">https://www.atcc.org/products/ccl-1</a>       | ATCC     | CCL-1    | 8           | Morphology check           |
| HEK293T  | <a href="https://www.atcc.org/products/crl-3216">https://www.atcc.org/products/crl-3216</a> | ATCC     | CRL-3216 | 17-20       | Morphology check           |

## 1.3 Organisms

| Name                                  | Citation                                                                                | Supplier               | Strain   | Sex | Age      | Overall n number |
|---------------------------------------|-----------------------------------------------------------------------------------------|------------------------|----------|-----|----------|------------------|
| C57BL/6J                              | <a href="https://www.jax.org/strain/000664">https://www.jax.org/strain/000664</a>       | The Jackson Laboratory | C57BL/6J | M   | 28 weeks | 20               |
| <i>foz/foz</i><br>( <i>Alsm1</i> -/-) | <a href="https://doi.org/10.1210/me.2005-0494">https://doi.org/10.1210/me.2005-0494</a> | GC Farrell             | NOD.B10  | M/F | 18 weeks | 40               |
| WT mice<br>( <i>Alsm1</i> +/+)        | <a href="https://doi.org/10.1210/me.2005-0494">https://doi.org/10.1210/me.2005-0494</a> | GC Farrell             | NOD.B10  | M/F | 18 weeks | 24               |

## 1.4 Sequence based reagents (primers)

| Name         | Forward sequence           | Reverse sequence      | Supplier   |
|--------------|----------------------------|-----------------------|------------|
| ASBT         | TGGATAGATGGCGACATGGA       | GGCAAGCAGTGTGGAGCAA   | Invitrogen |
| BSEP         | CTGCCAAGGATGCTAATGCA       | CGATGGCTACCCTTTGCTTCT | Invitrogen |
| CYP27A1      | GCCTCACCTATGGGATCTTCA      | TCAAAGCCTGACGCAGATG   | Invitrogen |
| CYP2A12      | AAGGCTATGGTGTGGATTC        | GTAGATGGTGGGGTCAATGG  | Invitrogen |
| CYP2A22      | GGGGACCGCTTCAACTACG        | GTCCAGGGTACTGTGGTTGTG | Invitrogen |
| CYP7A1       | AGCAACTAAACAACCTGCCAGTACTA | GTCCGGATATTCAAGGATGCA | Invitrogen |
| CYP7B1       | TAGCCCTCTTTCCTCCAATCATA    | GGCTGGCTTCCTGAGCTTATT | Invitrogen |
| CYP8B1       | GGCTGGCTTCCTGAGCTTATT      | ACTTCTGAACAGCTCATCGG  | Invitrogen |
| FABP6        | GTGGAAAGTAGACCGGAACGA      | GGAAGCAGCAGAAGCTTGGT  | Invitrogen |
| FGF15        | GACCAAACGAACGAAATTTGTT     | ACGTCTTGATGGCAATCG    | Invitrogen |
| FXR          | AGGAGCCCCTGCTTGATGT        | GCGGGTTCTCAGGCTGGTA   | Invitrogen |
| IL1 $\beta$  | AGTTGACGGACCCCAAAAGA       | GGACAGCCCAGGTCAAAGG   | Invitrogen |
| MCP1         | CCACTCACCTGCTGCTACTCAT     | CTGCTGGTGATCCTCTTGT   | Invitrogen |
| NTCP         | CTTGCGCCATAGGGATCTTC       | TGCCTGCCTTGAGGACGTA   | Invitrogen |
| OST $\alpha$ | CCGTCAAGCCAAGATGCAT        | CAAGCACCTGGAACAGAGCAA | Invitrogen |
| OST $\beta$  | CCGGGGGAACCTGAGTAGAA       | GTTATGGGGCGTTATGGGGT  | Invitrogen |
| RPL19        | GAAGGTCAAAGGGAATGTGTTCA    | CCTTGCTGCCTTCAGCTTGT  | Invitrogen |
| SHP          | AGGGTAGAGGCCATGAGGAG       | ACGATCCTCTTCAACCCAGA  | Invitrogen |
| TGR5         | GGCCTGGAACCTCTGTTATCG      | GTCCCTCTGGCTCTTCCTC   | Invitrogen |
| TNF $\alpha$ | GTGCCTATGTCTCAGCCTCTT      | GCTCATACCAGGGTTTGAGCT | Invitrogen |
| VCAM1        | AGTTGGGGATTTCGGTTGTTCT     | CCCCTCATTCTTACCACCC   | Invitrogen |

## 1.5 Biological samples

| Description | Source | Identifier |
|-------------|--------|------------|
| /           | /      | /          |

## 1.6 Deposited data

| Name of repository | Identifier | Link |
|--------------------|------------|------|
| /                  | /          | /    |

## 1.7 Software

| Software name | Manufacturer      | Version  |
|---------------|-------------------|----------|
| Prism         | GraphPad          | 9        |
| Visiopharm    | Visiopharm        |          |
| Rotor Gene Q  | Qiagen            | 2.3.1    |
| SoftMax Pro   | Molecular Devices | 7.1      |
| CTAn          | Blue Scientific   | 1.17.7.0 |

## 1.8 Other (e.g. drugs, proteins, vectors etc.)

|                                         |                        |            |
|-----------------------------------------|------------------------|------------|
| High fat diet                           | ResearchDiets          | D12492     |
| Normal diet                             | SAFE Diets             | A03        |
| Western diet                            | ResearchDiets          | D05011404  |
| Fructose                                | Sigma                  | F0127      |
| DCA                                     | Sigma                  | D2510      |
| TLCA                                    | Sigma                  | T7515      |
| LPS                                     | Sigma                  | L2630      |
| pCMV-SPORT6 human TGR5                  | Harvard Medical School | MGC:40597  |
| pGL4.29                                 | Promega                | E8471      |
| pGL4.73                                 | Promega                | E6911      |
| Dual-Luciferase Reporter Assay System   | Promega                | E1910      |
| Lipofectamine 2000 Transfection Reagent | Invitrogen             | 11668030   |
| Diaminobenzidine                        | Dako                   | K3468      |
| Mouse FGF15 ELISA kit                   | MyBioSource            | MBS2019544 |
| Ultrasensitive Mouse Insulin ELISA kit  | Mercodia               | 10-1249-01 |
| Total Bile Acid Assay                   | Diazyme                | DZ042A     |

## 1.9 Please provide the details of the corresponding methods author for the manuscript:

Prof. Isabelle A. Leclercq;  
 Laboratory of Hepato-Gastroenterology, Institute of Experimental and Clinical Research,  
 Université catholique de Louvain, Brussels, Belgium;  
 Avenue Mounier 53/B1.52.01, 1200 Woluwe-Saint-Lambert, Belgium;  
 isabelle.leclercq@uclouvain.be

## 2.0 Please confirm for randomised controlled trials all versions of the clinical protocol are included in the submission. These will be published online as supplementary information.

Not applicable
